# Supplementary material
Source: HighWire-hosted journal article supplement (https://rmdopen.bmj.com/content/3/2/e000604)
Supplement: inline-supplementary-material-1 [file inline-supplementary-material-1.xlsx]

## Sheet: Sheet1
Table S1: mouse primers used for q-PCR
	Forward primer (5’-3’)	Reverse primer (5’-3’)
acan	GCTGCAGTGATCTCAGAAGAAG	GATGGTGAGGGAAGACCCTA
col2a1	CTGCCAGTGGAAAATTAGGG	TTCTCCCTTGTCACCACGAT
mmp13	CCATTTGATGGACCTTCTGG	TCATGGGCAGCAACAATAAA
col10a1	CCTGGTTCATGGGATGTTTT	CAGGAATGCCTTGTTCTCCT
timp3	TGTGCAACTTTGTGGAGAGG	AGTCCAAACACTACGCCTGC
bcan	GACAACCGGTATCCGCAAAGT	CCTGGTTCAAAGCCACTGTT
dcor	TCTATGTGCCCCTACCGATG	GTTGTGTCGGGTGGAAAATC
vcan	AAGGCATCTTATGGATGTGCTC	CCTTTAACAGGTGGGCTGGT
ADAMTS4	GCCCGATTCATCATGACTT	CGGTCAGCGTCATAGTCCTT
ADAMTS5	CCGCTTCATCACTGACTTCC	GCGGTCAGGATCATAGTCCT
MMP2	AGACACTGGTCGCAGTGATG	CCCATGGTAAACAAGGCTTC
MMP9	TAGCTACCTCGAGGGCTTCC	GTGGTTCAGTTGTGGTGGTG
